# Supplementary material for: Evaluation of the autonomic nervous system by analysis of heart rate variability in the preterm infants
Source: BMC Cardiovasc Disord. 2019 Aug 16;19:198. doi: 10.1186/s12872-019-1166-4 (PMC6697963; doi:10.1186/s12872-019-1166-4)
Supplement: Supplementary file 1 — HRV premature database. (XLSX 13 kb) [file 12872_2019_1166_MOESM1_ESM.xlsx]

## Sheet: MOMENT 1
	MOMENT 1
PRETERM		HR	Intervalo RR	SDNN	rMSSD	pNN50	NN50	SD1	SD2	SD1/SD2	ApEn	SampEn
ID 01	12	154	390.6	6.6	3.1	0	0	2.2	9.1	4.158	1.217	1.199
ID 02	6	155	387.8	12.5	3.6	0	0	2.5	17.5	7	0.81	0.7
ID 03	12	149	397.3	9.8	2.8	0	0	2.1	13.4	6.38	0.81	0.7
ID 04	15	148	406.4	40.5	5.4	0.5	1	3.8	57.1	15.026	0.366	0.3
ID 05	7	150	398.6	13.4	1.5	0	0	1.1	19	17.272	0.502	0.313
ID 06	4	157	381.3	8.4	1.7	0	0	1.2	11.8	9.833	0.757	0.674
ID 07	10	143	421.6	6.4	8.4	0.6	12	6.0	6.8	1.148	1.498	1.838
ID 08	5	148	407.3	16.4	3.6	0	0	2.5	23	9.2	0.584	0.519
ID 09	3	156	385.5	13.1	2.5	0	0	1.7	18.5	10.882	0.718	0.623
ID 10	8	162	398.1	33.8	9.6	0.4	7	6.8	47.3	6.997	0.864	0.783
ID 11	4	157	382	6.9	6.4	0.1	2	4.5	8.6	1.899	1.056	0.992
ID 12	13	154	429.6	21	12.1	0.7	4	8.6	28.2	3.3	1.018	0.929
ID 13	7	152	399.8	15.5	7.1	0.2	2	5.0	21.3	4.26	1.041	0.896
ID 14	14	163	346.8	12.6	3.2	0	0	2.3	17.7	7.695	0.579	0.474
ID 15	8	171	396.8	10.2	9.7	0.9	2	6.9	12.6	1.835	0.961	0.968

## Sheet: MOMENT 2
	MOMENT 2
PRETERM		HR	Intervalo RR	SDNN	rMSSD	pNN50	NN50	SD1	SD2	SD1/SD2	ApEn	SampEn
ID 01	57	151	733.6	32.1	36.6	14.7	60	25.9	37.2	1.433	1.181	1.781
ID 02	46	173	350.0	5.1	2.5	0	0	1.7	7.0	4.023	1.173	1.145
ID 03	74	148	403.7	10.8	6.6	0	0	4.7	14.5	3.108	1.425	1.505
ID 04	47	173	346.6	9.1	6.7	0.6	9	4.7	12	2.535	0.706	0.607
ID 05	60	162	369.9	2.9	1.7	0	0	1.2	3.9	3.378	1.197	1.187
ID 06	55	182	335.4	8.2	4.0	0	0	2.8	11.3	3.983	1.056	0.928
ID 07	68	169	1164.9	20.6	25.9	2.3	10	18.3	22.7	1.24	1.299	1.990
ID 08	60	157	368.4	8.4	5.5	0.3	5	3.9	11.2	2.903	0.688	0.56
ID 09	53	143	382.2	14.3	13.3	1.8	31	9.4	17.9	1.904	0.947	0.822
ID 10	70	162	416.3	16.2	12.5	1.3	6	8.9	21.2	2.394	1.063	1.137
